# Supplementary material for: Emerging roles of ATF2 and the dynamic AP1 network in cancer
Source: Springer Nature journal article supplement (doi:10.1038/nrc2681), 2009-12-23
Supplement: 41568_2010_BFnrc2681_MOESM1_ESM.pdf [file 41568_2010_BFnrc2681_MOESM1_ESM.pdf]

Supplementary Information 1 | JUN Transcriptional Targets

**c-Jun Transcriptional Targets**

**Cell Cycle & Proliferation**

| <u>Gene</u>   | <u>References</u> |
|---------------|-------------------|
| Cyclin D1/A/E | 1-3               |
| p53           | 4-6               |
| p21           | 6, 7              |
| p16Ink4a      | 8                 |
| p19ARF        | 9                 |

**Apoptosis & Survival**

| <u>Gene</u> | <u>References</u> |
|-------------|-------------------|
| Bcl3        | 10                |
| PTEN        | 11                |
| Bim         | 12                |
| Dp5         | 13, 14            |

**Metastasis & Angiogenesis**

| <u>Gene</u> | <u>References</u> |
|-------------|-------------------|
| uPAR        | 15                |
| Matrylsin   | 16                |
| MMP1/2/3/9  | 17                |
| CD44        | 18                |
| Ezrin       | 18                |
| Krp1        | 19                |
| VEGF        | 20                |
| FGF-2       | 21                |

**Inflammation**

| <u>Gene</u>                                         | <u>References</u> |
|-----------------------------------------------------|-------------------|
| Secreted phosphoprotein 1 (SPP1/OPN)                | 22                |
| Prostaglandin endoperoxide synthase 1 (PTGS2/COX-2) | 22                |

**Table Legend**

Representative examples of c-Jun transcriptional targets that may play roles in promoting indicated tumorigenic behavior.

## References

1. Bakiri, L., Lallemand, D., Bossy-Wetzels, E. & Yaniv, M. Cell cycle-dependent variations in c-Jun and JunB phosphorylation: a role in the control of cyclin D1 expression. *EMBO J* **19**, 2056-2068 (2000).
2. Katabami, M. et al. Cyclin A is a c-Jun target gene and is necessary for c-Jun-induced anchorage-independent growth in RAT1a cells. *J Biol Chem* **280**, 16728-16738 (2005).
3. Hennigan, R.F. & Stambrook, P.J. Dominant negative c-jun inhibits activation of the cyclin D1 and cyclin E kinase complexes. *Mol Biol Cell* **12**, 2352-2363 (2001).
4. Eferl, R. et al. Liver Tumor Development: c-Jun Antagonizes the Proapoptotic Activity of p53. *Cell* **112**, 181-192 (2003).
5. Shaulian, E. The mammalian UV response: c-Jun induction is required for exit from p53-imposed growth arrest. *Cell* **103**, 897-907 (2000).
6. Stepniak, E. et al. c-Jun/AP-1 controls liver regeneration by repressing p53/p21 and p38 MAPK activity. *Genes Dev* **20**, 2306 - 2314 (2006).
7. Wang, C.H. et al. Transcriptional repression of p21((Waf1/Cip1/Sdi1)) gene by c-jun through Sp1 site. *Biochem Biophys Res Commun* **270**, 303-310 (2000).
8. Passegue, E. & Wagner, E.F. JunB suppresses cell proliferation by transcriptional activation of p16(INK4a) expression. *EMBO J* **19**, 2969-79 (2000).
9. Ameyar-Zazoua, M. et al. AP-1 dimers regulate transcription of the p14/p19ARF tumor suppressor gene. *Oncogene* **24**, 2298-306 (2005).
10. Bossy-Wetzels, E., Bakiri, L. & Yaniv, M. Induction of apoptosis by the transcription factor c-Jun. *EMBO J* **16**, 1695-709 (1997).
11. Hettinger, K. et al. c-Jun promotes cellular survival by suppression of PTEN. *Cell Death Differ* **14**, 218-229 (2006).
12. Whitfield, J., Neame, S.J., Paquet, L., Bernard, O. & Ham, J. Dominant-negative c-Jun promotes neuronal survival by reducing BIM expression and inhibiting mitochondrial cytochrome c release. *Neuron* **29**, 629-643 (2001).
13. Yuan, Z. et al. Opposing roles for ATF2 and c-Fos in c-Jun-mediated neuronal apoptosis. *Mol Cell Biol* (2009).
14. Ma, C. et al. dp5/HRK is a c-Jun target gene and required for apoptosis induced by potassium deprivation in cerebellar granule neurons. *J Biol Chem* **282**, 30901-9 (2007).
15. Leupold, J.H. et al. Src induces urokinase receptor gene expression and invasion/intravasation via activator protein-1/p-c-Jun in colorectal cancer. *Mol Cancer Res* **5**, 485-496 (2007).
16. Rivat, C. et al. Synergistic cooperation between the AP-1 and LEF-1 transcription factors in activation of the matrilysin promoter by the src oncogene: implications in cellular invasion. *Faseb J* **17**, 1721-1723 (2003).
17. Bos, T.J., Margiotta, P., Bush, L. & Wasilenko, W. Enhanced cell motility and invasion of chicken embryo fibroblasts in response to Jun over-expression. *Int J Cancer* **81**, 404-410 (1999).
18. Stapleton, G., Malliri, A. & Ozanne, B.W. Downregulated AP-1 activity is associated with inhibition of Protein-Kinase-C-dependent CD44 and ezrin localisation and upregulation of PKC theta in A431 cells. *J Cell Sci* **115**, 2713-2724 (2002).

19. Spence, H.J. Krp1, a novel kelch related protein that is involved in pseudopod elongation in transformed cells. *Oncogene* **19**, 1266-1276 (2000).
20. Ming, J., Zhang, Q., Qiu, X. & Wang, E. Interleukin 7/interleukin 7 receptor induce c-Fos/c-Jun-dependent vascular endothelial growth factor-D up-regulation: a mechanism of lymphangiogenesis in lung cancer. *Eur J Cancer* **45**, 866-73 (2009).
21. Zhang, G. et al. Squamous cell carcinoma growth in mice and in culture is regulated by c-Jun and its control of matrix metalloproteinase-2 and -9 expression. *Oncogene* **25**, 7260-7266 (2006).
22. Matthews, C.P. et al. Dominant-negative activator protein 1 (TAM67) targets cyclooxygenase-2 and osteopontin under conditions in which it specifically inhibits tumorigenesis. *Cancer Res* **67**, 2430-8 (2007).
