# Supplementary material for: Emerging roles of ATF2 and the dynamic AP1 network in cancer
Source: Springer Nature journal article supplement (doi:10.1038/nrc2681), 2009-12-23
Supplement: 41568_2010_BFnrc2681_MOESM3_ESM.pdf [file 41568_2010_BFnrc2681_MOESM3_ESM.pdf]

Supplementary Information 3 | **ATF/CREB Interactions with JUN  
& Tumorigenic Implications**

| <b><u>ATF/CREB Family Member</u></b> | <b><u>Known Interaction with Jun</u></b>                                                                                                                                         | <b><u>Implication in tumorigenic transformation</u></b>                                                                                                                                              |
|--------------------------------------|----------------------------------------------------------------------------------------------------------------------------------------------------------------------------------|------------------------------------------------------------------------------------------------------------------------------------------------------------------------------------------------------|
| ATF-1                                | Probable interactions with JUN in intestinal inflammation model <sup>1</sup> .                                                                                                   | Involvement in hypoxic response <sup>2</sup> and in inflammatory response <sup>3</sup>                                                                                                               |
| ATF-2                                | JUN binding in cancer <sup>4,5</sup> .                                                                                                                                           | Multiple ATF2 transcriptional alterations in cancer <sup>4,6</sup> .                                                                                                                                 |
| ATF-3                                | JUN binding during E1A-mediated transformation <sup>7</sup> . ATF3 dimerization with JUN mediates Ras signaling, while dimerization with JunD abrogates signaling <sup>8</sup> . | Highly probably Jun binding during cellular transformation and neuronal survival response <sup>8,9</sup> . ATF3 promotes growth factor independence in chicken embryonic fibroblasts <sup>10</sup> . |
| ATF-4 (CREB2)                        | Suggested competitive binding of Jun between ATF-2 and ATF-4 to modulate cyclin A signaling <sup>11</sup> .                                                                      | Loss of ATF4 abrogates H-Ras transformation <sup>12</sup> . Increased ATF2 expression in leukemia <sup>13</sup> . Loss of ATF4 promotes loss of osteoblast differentiation <sup>14</sup> .           |
| ATF-5 (ATFx)                         | N/A                                                                                                                                                                              | Increased ATF5 expression in Hodgkin's lymphoma <sup>15</sup> .                                                                                                                                      |
| ATF6a                                | N/A                                                                                                                                                                              | Increased expression in hepatocarcinoma <sup>16</sup> . ATF6a required for tumor cell survival via Rheb-mTor pathway <sup>17</sup> .                                                                 |
| ATF-7 (ATFa)                         | Binding with Jun and Fos via TAF4, which modulate transcriptional activity <sup>18,19</sup> .                                                                                    | Upregulation of ATF7 in human cervical cancer <sup>20</sup> . Implicated in anti-apoptotic                                                                                                           |

|       |                                                                                                                       |                                                                                                                             |
|-------|-----------------------------------------------------------------------------------------------------------------------|-----------------------------------------------------------------------------------------------------------------------------|
|       |                                                                                                                       | signaling <sup>21</sup> .                                                                                                   |
| B-ATF | Demonstrated binding to JunB, JUN, JunD, and to a lesser extent, to c-Fos <sup>22</sup> .                             | B-ATF functions as tumor suppressor <sup>23</sup> .                                                                         |
| CREB  | Demonstrated binding with JUN <sup>24,25</sup> .                                                                      | CREB plays multiple roles in tumorigenesis <sup>26,27</sup> .                                                               |
| CREM  | Demonstrated not to bind to Jun, but to antagonize Jun transcription via competitive promoter binding <sup>28</sup> . | Increased CREM expression in adrenocortical and lung carcinoma <sup>29,30</sup> .<br>Upregulation by HTLV-1 <sup>31</sup> . |
| JDP-1 | Demonstrated to bind JUN, but to a much lesser extent than JDP-2 <sup>32</sup> .                                      | Expression correlates with estrogen receptor status in breast cancer <sup>33</sup> .                                        |
| JDP-2 | Demonstrated to bind JUN <sup>32, 34</sup> .                                                                          | JDP2 functions as tumor suppressor <sup>35</sup> .                                                                          |

**Legend**

Known interactions between ATF family members and JUN and tumorigenic implications.

**References**

1. Hokari, R. et al. Vasoactive intestinal peptide upregulates MUC2 intestinal mucin via CREB/ATF1. *Am J Physiol Gastrointest Liver Physiol* **289**, G949-59 (2005).
2. Kvietikova, I., Wenger, R.H., Marti, H.H. & Gassmann, M. The transcription factors ATF-1 and CREB-1 bind constitutively to the hypoxia-inducible factor-1 (HIF-1) DNA recognition site. *Nucleic Acids Res* **23**, 4542-50 (1995).
3. Chan, C.P. et al. Thrombin activates Ras-CREB/ATF-1 signaling and stimulates c-fos, c-jun, and c-myc expression in human gingival fibroblasts. *J Periodontol* **79**, 1248-54 (2008).
4. van Dam, H. & Castellazzi, M. Distinct roles of Jun:Fos and Jun:ATF dimers in oncogenesis. *Oncogene* **20**, 2453-2464 (2001).
5. Harrison, J.G., Sugden, P.H. & Clerk, A. Endothelin-1 promotes phosphorylation of CREB transcription factor in primary cultures of neonatal rat cardiac myocytes: implications for the regulation of c-jun expression. *Biochim Biophys Acta* **1644**, 17-25 (2004).
6. Vlahopoulos, S.A. et al. The role of ATF-2 in oncogenesis. *Bioessays* **30**, 314-27 (2008).

7. Hagemeyer, B.M., Angel, P. & van Dam, H. Modulation of AP-1/ATF transcription factor activity by the adenovirus-E1A oncogene products. *Bioessays* **17**, 621-9 (1995).
8. Nilsson, M., Ford, J., Bohm, S. & Toftgard, R. Characterization of a nuclear factor that binds juxtaposed with ATF3/Jun on a composite response element specifically mediating induced transcription in response to an epidermal growth factor/Ras/Raf signaling pathway. *Cell Growth Differ* **8**, 913-20 (1997).
9. Nakagomi, S., Suzuki, Y., Namikawa, K., Kiryu-Seo, S. & Kiyama, H. Expression of the activating transcription factor 3 prevents c-Jun N-terminal kinase-induced neuronal death by promoting heat shock protein 27 expression and Akt activation. *J Neurosci* **23**, 5187-96 (2003).
10. Perez, S., Vial, E., van Dam, H. & Castellazzi, M. Transcription factor ATF3 partially transforms chick embryo fibroblasts by promoting growth factor-independent proliferation. *Oncogene* **20**, 1135-41 (2001).
11. Shimizu, M. et al. Activation of the rat cyclin A promoter by ATF2 and Jun family members and its suppression by ATF4. *Exp Cell Res* **239**, 93-103 (1998).
12. Mielnicki, L.M., Hughes, R.G., Chevray, P.M. & Pruitt, S.C. Mutated Atf4 suppresses c-Ha-ras oncogene transcript levels and cellular transformation in NIH3T3 fibroblasts. *Biochem Biophys Res Commun* **228**, 586-95 (1996).
13. Daibata, M. et al. Differential gene-expression profiling in the leukemia cell lines derived from indolent and aggressive phases of CD56+ T-cell large granular lymphocyte leukemia. *Int J Cancer* **108**, 845-51 (2004).
14. Matsuguchi, T. et al. JNK activity is essential for Atf4 expression and late-stage osteoblast differentiation. *J Bone Miner Res* **24**, 398-410 (2009).
15. Schwering, I. et al. Profiling of Hodgkin's lymphoma cell line L1236 and germinal center B cells: identification of Hodgkin's lymphoma-specific genes. *Mol Med* **9**, 85-95 (2003).
16. Shuda, M. et al. Activation of the ATF6, XBP1 and grp78 genes in human hepatocellular carcinoma: a possible involvement of the ER stress pathway in hepatocarcinogenesis. *J Hepatol* **38**, 605-14 (2003).
17. Schewe, D.M. & Aguirre-Ghiso, J.A. ATF6alpha-Rheb-mTOR signaling promotes survival of dormant tumor cells in vivo. *Proc Natl Acad Sci U S A* **105**, 10519-24 (2008).
18. Chatton, B. et al. Jun and Fos heterodimerize with ATFa, a member of the ATF/CREB family and modulate its transcriptional activity. *Oncogene* **9**, 375-85 (1994).
19. Hamard, P.J. et al. A functional interaction between ATF7 and TAF12 that is modulated by TAF4. *Oncogene* **24**, 3472-83 (2005).
20. Vazquez-Ortiz, G. et al. Differentially expressed genes between high-risk human papillomavirus types in human cervical cancer cells. *Int J Gynecol Cancer* **17**, 484-91 (2007).
21. Persengiev, S.P., Devireddy, L.R. & Green, M.R. Inhibition of apoptosis by ATFx: a novel role for a member of the ATF/CREB family of mammalian bZIP transcription factors. *Genes Dev* **16**, 1806-14 (2002).
22. Dorsey, M.J. et al. B-ATF: a novel human bZIP protein that associates with members of the AP-1 transcription factor family. *Oncogene* **11**, 2255-65 (1995).
23. Echlin, D.R., Tae, H.J., Mitin, N. & Taparowsky, E.J. B-ATF functions as a negative regulator of AP-1 mediated transcription and blocks cellular transformation by Ras and Fos. *Oncogene* **19**, 1752-63 (2000).
24. Benbrook, D.M. & Jones, N.C. Heterodimer formation between CREB and JUN proteins. *Oncogene* **5**, 295-302 (1990).

25. Ransone, L.J., Wamsley, P., Morley, K.L. & Verma, I.M. Domain swapping reveals the modular nature of Fos, Jun, and CREB proteins. *Mol Cell Biol* **10**, 4565-73 (1990).
26. Siu, Y.T. & Jin, D.Y. CREB--a real culprit in oncogenesis. *FEBS J* **274**, 3224-32 (2007).
27. Karamouzis, M.V., Konstantinopoulos, P.A. & Papavassiliou, A.G. Roles of CREB-binding protein (CBP)/p300 in respiratory epithelium tumorigenesis. *Cell Res* **17**, 324-32 (2007).
28. Masquillier, D. & Sassone-Corsi, P. Transcriptional cross-talk: nuclear factors CREM and CREB bind to AP-1 sites and inhibit activation by Jun. *J Biol Chem* **267**, 22460-6 (1992).
29. Groussin, L., Massias, J.F., Bertagna, X. & Bertherat, J. Loss of expression of the ubiquitous transcription factor cAMP response element-binding protein (CREB) and compensatory overexpression of the activator CREMtau in the human adrenocortical cancer cell line H295R. *J Clin Endocrinol Metab* **85**, 345-54 (2000).
30. Andela, V.B. et al. Clinical relevance of increased retinoid and cAMP transcriptional programs in tumor cells rendered non-malignant by dominant negative inhibition of NFkappaB. *Cancer Lett* **194**, 37-43 (2003).
31. Yoshida, M. Mechanism of transcriptional activation of viral and cellular genes by oncogenic protein of HTLV-1. *Leukemia* **8 Suppl 1**, S51-3 (1994).
32. Aronheim, A., Zandi, E., Hennemann, H., Elledge, S.J. & Karin, M. Isolation of an AP-1 repressor by a novel method for detecting protein- protein interactions. *Mol Cell Biol* **17**, 3094-3102 (1997).
33. De Bessa, S.A. et al. JDP1 (DNAJC12/Hsp40) expression in breast cancer and its association with estrogen receptor status. *Int J Mol Med* **17**, 363-7 (2006).
34. Wardell, S.E., Boonyaratanakornkit, V., Adelman, J.S., Aronheim, A. & Edwards, D.P. Jun dimerization protein 2 functions as a progesterone receptor N-terminal domain coactivator. *Mol Cell Biol* **22**, 5451-66 (2002).
35. Heinrich, R., Livne, E., Ben-Izhak, O. & Aronheim, A. The c-Jun dimerization protein 2 inhibits cell transformation and acts as a tumor suppressor gene. *J Biol Chem* **279**, 5708-15 (2004).
